# Supplementary material for: The most exposed regions of SARS-CoV-2 structural proteins are subject to strong positive selection and gene overlap may locally modify this behavior
Source: PubMed Central journal article supplement (PMC10804949; doi:10.1128/msystems.00713-23), 2023-12-14
Supplement: reviewer-comments.pdf [file reviewer-comments.pdf]

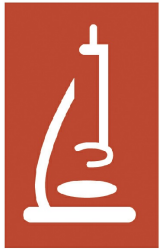

AMERICAN  
SOCIETY FOR  
MICROBIOLOGY

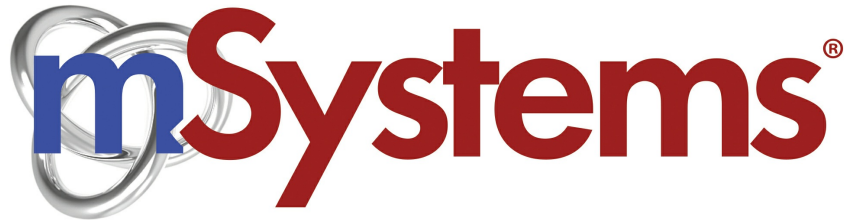

# The most exposed regions of SARS-CoV-2 structural proteins are subject to strong positive selection and gene overlap may locally modify this behavior

Alejandro Rubio, Maria de Toro, and Antonio Pérez-Pulido

*Corresponding Author(s): Antonio Pérez-Pulido, Universidad Pablo de Olavide*

---

## Review Timeline:

|                     |                   |
|---------------------|-------------------|
| Submission Date:    | July 10, 2023     |
| Editorial Decision: | November 2, 2023  |
| Revision Received:  | November 8, 2023  |
| Accepted:           | November 10, 2023 |

---

*Editor: Irina El Khoury*

*Reviewer(s): Disclosure of reviewer identity is with reference to reviewer comments included in decision letter(s). The following individuals involved in review of your submission have agreed to reveal their identity: Nash D Rochman (Reviewer #1)*

## Transaction Report:

(Note: With the exception of the correction of typographical or spelling errors that could be a source of ambiguity, letters and reports are not edited. The original formatting of letters and referee reports may not be reflected in this compilation.)

**DOI:** <https://doi.org/10.1128/msystems.00713-23>

Re: mSystems00713-23 (The most exposed regions of SARS-CoV-2 structural proteins are subject to strong positive selection and gene overlap may locally modify this behavior)

Dear Dr. Antonio J Pérez-Pulido:

Thank you for the privilege of reviewing your work. Below you will find my comments, instructions from the mSystems editorial office, and the reviewer comments.

Please address the comments by the reviewer #1. I would also consider changing the background in Figure 5 from black to white (might need to recolor the protein domains for visibility).

Please return the manuscript within 60 days; if you cannot complete the modification within this time period, please contact me. If you do not wish to modify the manuscript and prefer to submit it to another journal, notify me immediately so that the manuscript may be formally withdrawn from consideration by mSystems.

### Revision Guidelines

To submit your modified manuscript, log into the submission site at <https://msystems.msubmit.net/cgi-bin/main.plex>. Go to Author Tasks and click the appropriate manuscript title to begin. The information you entered when you first submitted the paper will be displayed; update this as necessary. Note the following requirements:

- Upload point-by-point responses to the issues raised by the reviewers in a file named "Response to Reviewers," NOT IN YOUR COVER LETTER
- Upload a compare copy of the manuscript (without figures) as a "Marked-Up Manuscript" file
- Upload a clean .DOC/.DOCX version of the revised manuscript and remove the previous version
- Each figure must be uploaded as a separate, editable, high-resolution file (TIFF or EPS preferred), and any multipanel figures must be assembled into one file
- Any [supplemental material](#) intended for posting by ASM should be uploaded separate from the main manuscript; you can combine all supplemental material into one file (preferred) or split it into a maximum of 10 files, with all associated legends included

For complete guidelines on revision requirements, see our [Submission and Review Process](#) webpage. Submission of a paper that does not conform to guidelines may delay acceptance of your manuscript.

**Data availability:** ASM policy requires that data be available to the public upon online posting of the article, so please verify all links to sequence records, if present, and make sure that each number retrieves the full record of the data. If a new accession number is not linked or a link is broken, provide mSystems production staff with the correct URL for the record. If the accession numbers for new data are not publicly accessible before the expected online posting of the article, publication may be delayed; please contact production staff ([mSystems@asmusa.org](mailto:mSystems@asmusa.org)) immediately with the expected release date.

**Publication Fees:** For information on publication fees and which article types are subject to charges, visit our [website](#). If your manuscript is accepted for publication and any fees apply, you will be contacted separately about payment during the production process; please follow the instructions in that e-mail. Arrangements for payment must be made before your article is published.

**ASM Membership:** Corresponding authors may [join or renew ASM membership](#) to obtain discounts on publication fees. Need to upgrade your membership level? Please contact Customer Service at [Service@asmusa.org](mailto:Service@asmusa.org).

The ASM Journals program strives for constant improvement in our submission and publication process. Please tell us how we can improve your experience by taking this quick [Author Survey](#).

Thank you for submitting your paper to mSystems.

Sincerely,  
Irina El Khoury  
Editor  
mSystems

Reviewer #1 (Comments for the Author):

The authors present an interesting, timely study charting variation in selection pressures across the SARS-CoV-2 genome by computing the  $K_a/K_s$  ratio over sliding windows. Positive selection is demonstrated to be strongest in motifs of the genome which code for exposed regions of structural proteins. Nonstructural proteins are demonstrated to primarily evolve under

purifying selection. Perhaps the most interesting result is the demonstration that regions of the genome corresponding to more than one overlapping ORF are subject to relatively increased purifying selection. While these results may not be wholly unexpected, I find the clear demonstration of these trends in the manuscript compelling. I have two comments.

First, the authors compute Ka/Ks over all possible reading frames in their demonstration of the effects of known ORF overlap. The authors also briefly discuss how unexplained variation in Ka/Ks over alternative reading frames may indicate the presence of additional, unidentified ORFs. Along similar lines, the authors have previously applied these methods to novel gene identification (<https://academic.oup.com/bib/article/23/2/bbac010/6519794#338439246>). There has been some discussion of the possibility of negative-sense ORFs in SARS-CoV-2 (<https://academic.oup.com/bib/article/23/3/bbac045/6539840>) and perhaps more broadly among other (+)ssRNA viruses. I'm curious to know if the authors have considered how these methods could be used to identify such cases.

Secondly, the authors focus on only 1839 SARS-CoV-2 genomes collected over an 8 month period from a single clinical center. I hope the authors could motivate why these genomes were studied specifically instead of working with a much larger sample of available sequences. I do not believe the results will substantially change with the inclusion of a greater number of sequences but I do feel an explanation of the rationale to include only this relatively small dataset is important. Furthermore, the authors suggest the number of SARS-CoV-2 genomes analyzed enables, "studies of all kinds, which are not possible with other virus species." While there are certainly few viruses with the same magnitude of data availability as SARS-CoV-2 (all Influenza), there are several more with more than 2k complete, non-redundant genomes available. Specifically, studies detailing variation in selection pressures across the genomes of these viruses, as is the focus of this manuscript, have been completed (I will selfishly direct the authors to consider my own as an example: <https://www.pnas.org/doi/abs/10.1073/pnas.2121335119>).

I restate that I believe this to be an interesting and timely study.

Sincerely,

Nash Rochman (invited to review 07/24/23; review returned to editor 07/25/23)

**“The most exposed regions of SARS-CoV-2 structural proteins are subject to strong positive selection and gene overlap may locally modify this behavior”**

**Response to reviewers**

We would like to thank Dr. Nash Rochman for the review of our article and the words about it. His work has undoubtedly made the article better and we have now thought of new ideas about the project that we had not thought of before.

**Reviewer #1 (Comments for the Author):**

**The authors present an interesting, timely study charting variation in selection pressures across the SARS-CoV-2 genome by computing the Ka/Ks ratio over sliding windows. Positive selection is demonstrated to be strongest in motifs of the genome which code for exposed regions of structural proteins. Nonstructural proteins are demonstrated to primarily evolve under purifying selection. Perhaps the most interesting result is the demonstration that regions of the genome corresponding to more than one overlapping ORF are subject to relatively increased purifying selection. While these results may not be wholly unexpected, I find the clear demonstration of these trends in the manuscript compelling. I have two comments.**

**First, the authors compute Ka/Ks over all possible reading frames in their demonstration of the effects of known ORF overlap. The authors also briefly discuss how unexplained variation in Ka/Ks over alternative reading frames may indicate the presence of additional, unidentified ORFs. Along similar lines, the authors have previously applied these methods to novel gene identification (<https://academic.oup.com/bib/article/23/2/bbac010/6519794#338439246>). There has been some discussion of the possibility of negative-sense ORFs in SARS-CoV-2 (<https://academic.oup.com/bib/article/23/3/bbac045/6539840>) and perhaps more broadly among other (+)ssRNA viruses. I'm curious to know if the authors have considered how these methods could be used to identify such cases.**

This seems to us to be a very interesting possibility for this type of analysis. In fact, it was as a result of our article applied to the search and validation of "missing genes" that Dr. Alex Bateman contacted us. Upon reading our work, it seemed to him that it might be something of interest for searching for spurious proteins in databases, and validating computational predictions. And so, we have explored some ways to do this in collaboration with him.

In the current manuscript we mention the work of Bartas et al., but certainly we do not discuss much the potential of the Ka/Ks calculation in gene prediction. Therefore, we have now added the following paragraph in the discussion:

“The analysis of the Ka/Ks ratio in single-stranded RNA viruses may even be useful to find or validate genes encoded in the complementary strand of the virus genome, something that in SARS-CoV-2 has already been predicted by means of a computational procedure, in which the 3D structure and possible function of these non-experimentally validated genes have been studied (38). **Ka/Ks ratio analysis could be useful to highlight these regions with possible**

alternative coding, as we previously demonstrated in bacteria (28). Thus, new unknown genes in viral genomes could be proposed for further laboratory validation.”

**Secondly, the authors focus on only 1839 SARS-CoV-2 genomes collected over an 8 month period from a single clinical center. I hope the authors could motivate why these genomes were studied specifically instead of working with a much larger sample of available sequences. I do not believe the results will substantially change with the inclusion of a greater number of sequences but I do feel an explanation of the rationale to include only this relatively small dataset is important. Furthermore, the authors suggest the number of SARS-CoV-2 genomes analyzed enables, "studies of all kinds, which are not possible with other virus species." While there are certainly few viruses with the same magnitude of data availability as SARS-CoV-2 (all Influenza), there are several more with more than 2k complete, non-redundant genomes available. Specifically, studies detailing variation in selection pressures across the genomes of these viruses, as is the focus of this manuscript, have been completed (I will selfishly direct the authors to consider my own as an example):**

**<https://www.pnas.org/doi/abs/10.1073/pnas.2121335119>**.

It is true that this fact could appear to be a handicap of our study. However, our initial idea was always to use homogeneous and comparable data, as we emphasize in several parts of the article:

- “Here, 1839 SARS-CoV-2 virus genomes have been analyzed, which were collected by the same hospital during a period of 8 months, allowing the analysis of the selection pressure of their genes in a limited period of time and region.”
- “The fact that all genomes used here are genomes processed in the same way guarantees an unbiased homogenization of the data set used.”

These are genomes that have been processed by the co-author of the paper, Dr. Maria de Toro, and we wanted to establish a collaboration with her, to publish and analyze her own data, which were uniform.

In fact, we have already raised the possibility of analyzing other RNA virus species, more with the idea of analyzing the unexplained result that occurs on the complementary strand (the selection pressure in the -2 reading frame). But we would need time and means to carry it out. In fact, I make here the proposal for a possible collaboration.

To be concrete, we have modified the sentence in the introduction in order to be more precise:

“This has resulted in the availability of an enormous number of genomes from different strains, the comparison of which allows studies of all kinds, **more limited** with other virus species.”

In the discussion, we have included a new sentence, making it clear that indeed genomes of other viruses are already available in current databases and evolutionary studies can be carried out:

“The work presented here is an example of a use that could be useful for selection pressure analysis of other viruses, when a large number of genomes are available. **In the current genomic era, this number is growing rapidly, allowing for massive evolutionary analyses of viral species (34).** However, the rate of change throughout the entire **SARS-CoV-2** pandemic has not been assessed here, as has been evaluated in other works (35).”

**I restate that I believe this to be an interesting and timely study.**

**Sincerely,**

**Nash Rochman (invited to review 07/24/23; review returned to editor 07/25/23)**

Thank you again for all the time spent reviewing our work and congratulations on the work you do.

Re: mSystems00713-23R1 (The most exposed regions of SARS-CoV-2 structural proteins are subject to strong positive selection and gene overlap may locally modify this behavior)

Dear Dr. Antonio J Pérez-Pulido:

Your manuscript has been accepted, and I am forwarding it to the ASM production staff for publication. Your paper will first be checked to make sure all elements meet the technical requirements. ASM staff will contact you if anything needs to be revised before copyediting and production can begin. Otherwise, you will be notified when your proofs are ready to be viewed.

**Data Availability:** ASM policy requires that data be available to the public upon online posting of the article, so please verify all links to sequence records, if present, and make sure that each number retrieves the full record of the data. If a new accession number is not linked or a link is broken, provide production staff with the correct URL for the record. If the accession numbers for new data are not publicly accessible before the expected online posting of the article, publication may be delayed; please contact ASM production staff immediately with the expected release date.

**Publication Fees:** For information on publication fees and which article types have charges, please visit our [website](#). We have partnered with Copyright Clearance Center (CCC) to collect author charges. If fees apply to your paper, you will receive a message from no-reply@copyright.com with further instructions. For questions related to paying charges through RightsLink, please contact CCC at ASM\_Support@copyright.com or toll free at +1-877-622-5543. CCC makes every attempt to respond to all emails within 24 hours.

**ASM Membership:** Corresponding authors may [join or renew ASM membership](#) to obtain discounts on publication fees. Need to upgrade your membership level? Please contact Customer Service at Service@asmusa.org.

**PubMed Central:** ASM deposits all mSystems articles in PubMed Central and international PubMed Central-like repositories immediately after publication. Thus, your article is automatically in compliance with the NIH access mandate. If your work was supported by a funding agency that has public access requirements like those of the NIH (e.g., the Wellcome Trust), you may post your article in a similar public access site, but we ask that you specify that the release date be no earlier than the date of publication on the mSystems website.

**Embargo Policy:** A press release may be issued as soon as the manuscript is posted on the [mSystems Latest Articles webpage](#). The corresponding author will receive an email with the subject line "ASM Journals Author Services Notification" when the article is available online.

**Featured Image Submissions:** If you would like to submit a potential Featured Image, please email a file and a short legend to mSystems@asmusa.org. Please note that we can only consider images that (i) the authors created or own and (ii) have not been previously published. By submitting, you agree that the image can be used under the same terms as the published article. File requirements: square dimensions (4" x 4"), 300 dpi resolution, RGB colorspace, TIF file format.

**Author Video:** For mSystems research articles, you are welcome to submit a short author video for your recently accepted paper. Videos are normally 1 minute long and are a great opportunity for junior authors to get greater exposure. Importantly, this video will not hold up the publication of your paper and you can submit it at any time.

Details of the video are:

- Minimum resolution of 1280 x 720
- .mov or .mp4 video format
- Provide video in the highest quality possible but do not exceed 1080p
- Provide a still/profile picture that is 640 (w) x 720 (h) max
- Provide the script that was used

We recognize that the video files can become quite large, so to avoid quality loss ASM suggests sending the video file via <https://www.wetransfer.com/>. When you have a final version of the video and the still ready to share, please send it to mSystems staff at mSystems@asmusa.org.

Thank you for submitting your paper to mSystems.

Sincerely,  
Irina El Khoury  
Editor  
mSystems
